# Supplementary material for: Maternal Ezh1/2 deficiency in oocyte delays H3K27me2/3 restoration and impairs epiblast development responsible for embryonic sub-lethality in mouse
Source: Oxford University Press journal article supplement (doi:10.1242/dev.200316), 2022-07-07
Supplement: dev200316supp.pdf [file dev200316supp.pdf]

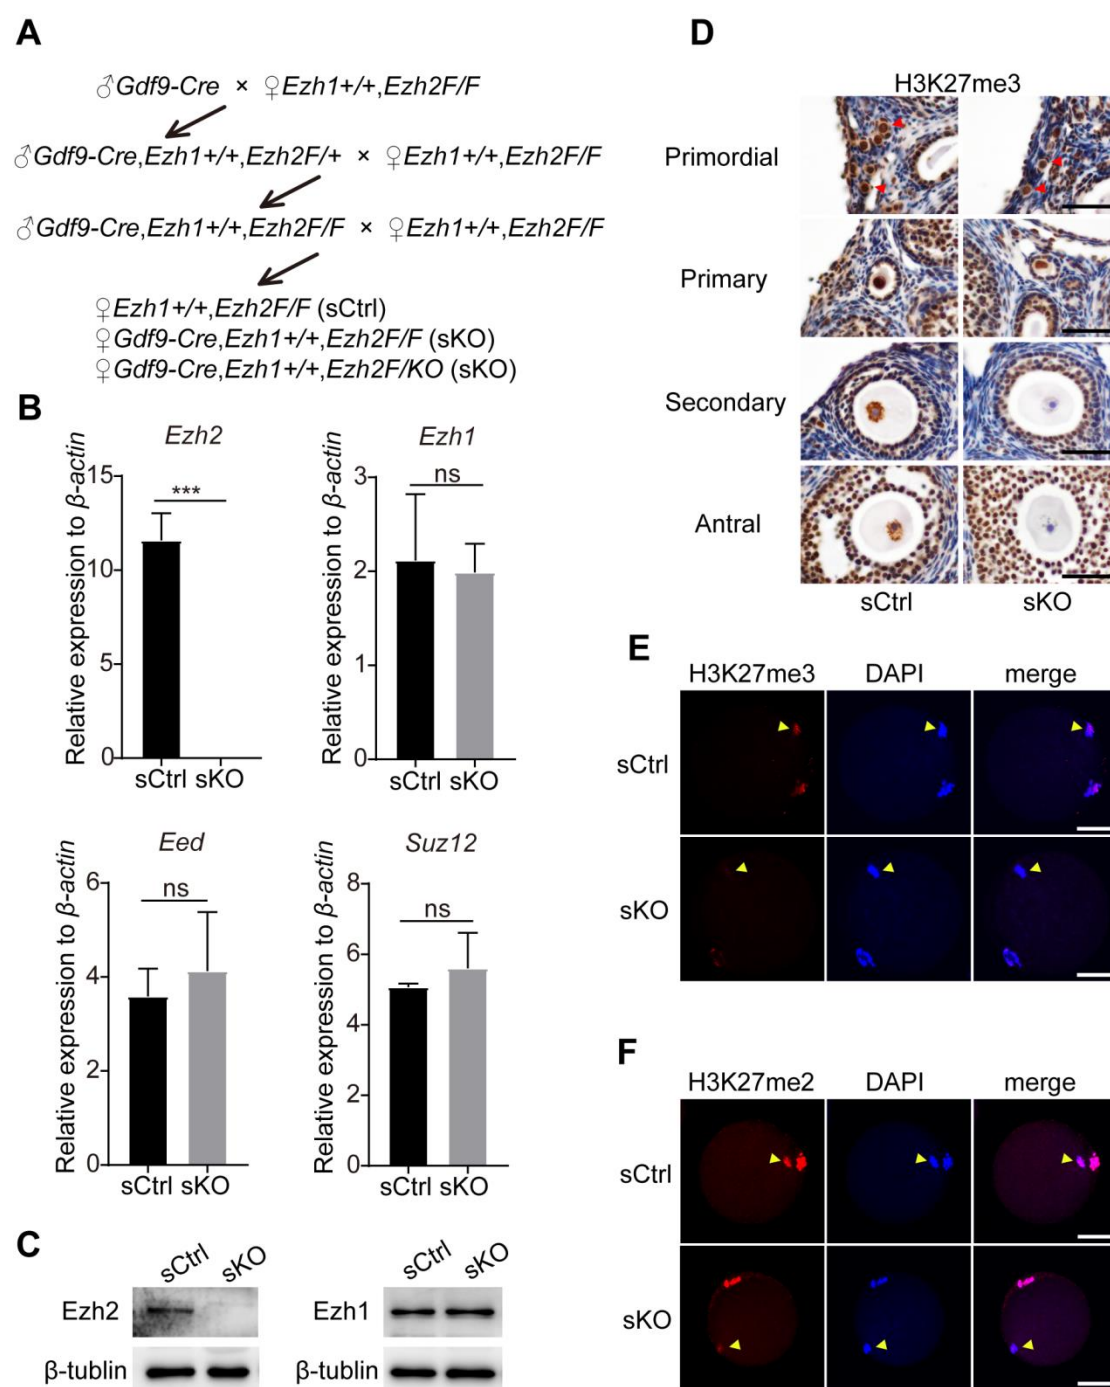

**Fig. S1. Generation of maternal *Ezh2* deficient mice and knockout efficiency in oocytes.** (A) Breeding scheme used to generate sCtrl and sKO mice. (B) Real-time PCR analysis of mRNA level for *Ezh2*, *Ezh1*, *Eed* and *Suz12* in sCtrl and sKO oocytes. Data are presented as the mean  $\pm$  SD. Unpaired *t* test: ns, not significant; \*\*\**P* < 0.001. (C) Levels of *Ezh2* and *Ezh1* protein in oocytes as assessed by western blot analysis;  $\beta$ -tubulin was used as loading control. (D) H3K27me3 in

oocytes from primordial, primary, secondary and antral follicles checked by immunohistochemical (IHC) staining. Ovary sections were stained with anti-H3K27me3 antibody and counterstained with hematoxylin. The primordial follicles were indicated by red arrows. Scale bars, 50  $\mu$ m. **(E and F)** H3K27me3 and H3K27me2 in super-ovulated oocytes measured by immunofluorescence (IF) staining. The chromosomes of oocytes were indicated by yellow arrows. Number of oocytes examined for H3K27me3: sCtrl, n=27; sKO, n=21. For H3K27me2: sCtrl, n=16; sKO, n=20. Scale bars, 50  $\mu$ m.

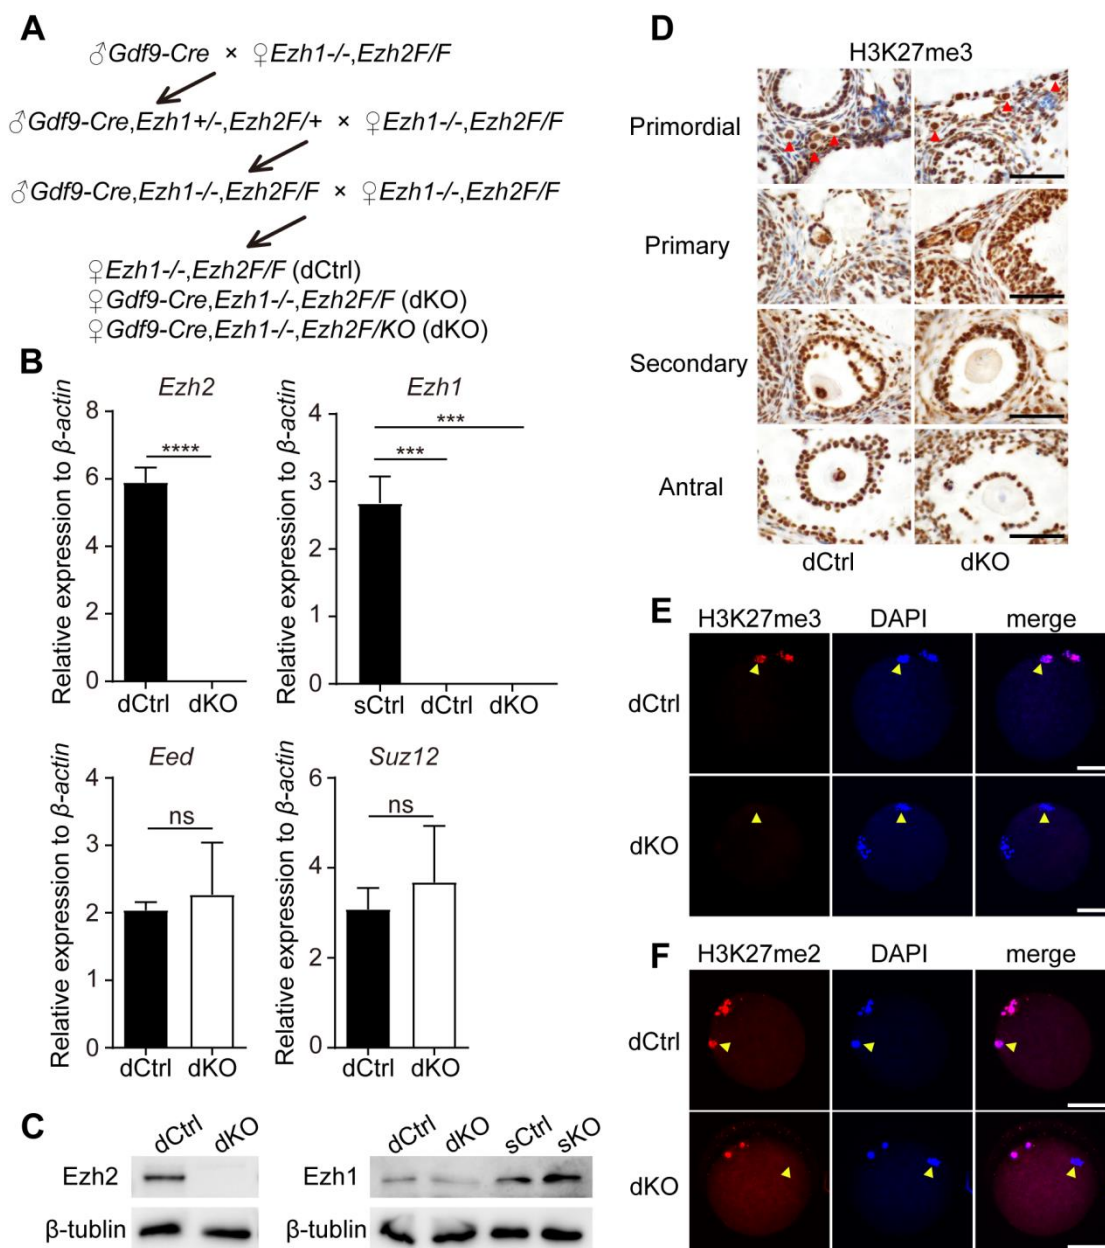

**Fig. S2. Generation of maternal *Ezh1/2* deficient mice and knock out efficiency in oocytes.** (A) Breeding scheme used to generate dCtrl and dKO mice. (B) Real-time PCR analysis of *Ezh2*, *Ezh1*, *Eed* and *Suz12* transcripts in dCtrl and dKO oocytes. Data are presented as the mean  $\pm$  SD. Unpaired *t* test: ns, not significant; \*\*\**P* < 0.001; \*\*\*\**P* < 0.0001. (C) Levels of *Ezh2* and *Ezh1* protein in oocytes as assessed by western blot analysis;  $\beta$ -tubulin was used as loading control. (D) IHC staining showed H3K27me3 modification in oocytes from primordial, primary, secondary and antral follicles. Ovary sections were stained with anti-H3K27me3 antibody and then counterstained with hematoxylin. The primordial follicles were indicated by red arrows. Scale bars, 50  $\mu$ m. (E and F) IF analysis of H3K27me3 and H3K27me2 in super-ovulated oocytes. The chromosomes of oocytes were indicated by yellow arrows. Number of oocytes examined for H3K27me3: dCtrl, n=16; dKO, n=28. For H3K27me2: dCtrl, n=24; dKO, n=32. Scale bars, 50 $\mu$ m.

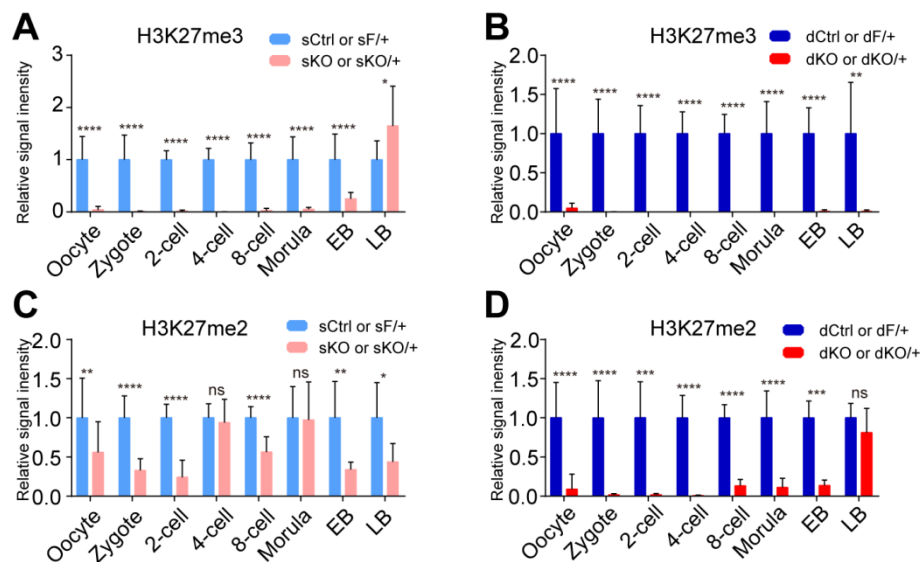

**Fig. S3. The relative level of H3K27me3 and H3K27me2 signals in oocytes and embryos.** (A) Relative H3K27me3 signal intensity in single knockout groups. (B) Relative H3K27me3 signal intensity in double knockout groups. (C) Relative H3K27me2 signal intensity in single knockout groups. (D) Relative H3K27me2 signal intensity in double knockout groups. EB, early blastocyst; LB, late blastocyst. The average signals of control oocytes or embryos were set as 1.0. Results are presented as mean  $\pm$  SD. Mann Whitney test or unpaired  $t$  test: ns, not significant;  $*P < 0.05$ ;  $**P < 0.01$ ;  $***P < 0.001$ ;  $****P < 0.0001$ .

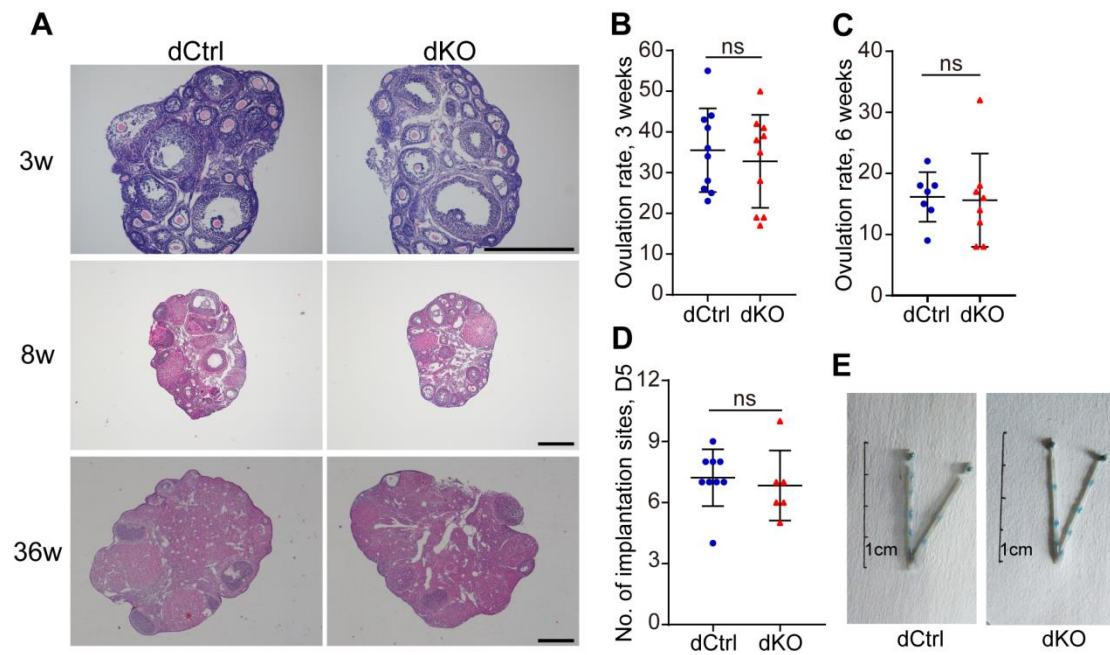

**Fig. S4. Ovary morphology, ovulation rate and implantation site in dCtrl and dKO female mice.** (A) Ovary sections stained with hematoxylin-rosin (HE) from 3-, 8-, and 36-wk-old mice. 3-wk-old mice were treated with PMSG for 46 hours. Scale bars, 500  $\mu$ m. (B and C) The number of ovulated oocytes per female mouse with superovulation treatment. (D) The number of implantation sites on Day 5 of pregnancy in dCtrl and dKO mice. (E) Representative images of uteri with implantation sites on Day 5. Scale bars, 1cm. Results are presented as mean  $\pm$  SD. Statistical comparisons of values were made using unpaired *t* test (B and C) or Mann Whitney test (D). ns, not significant.

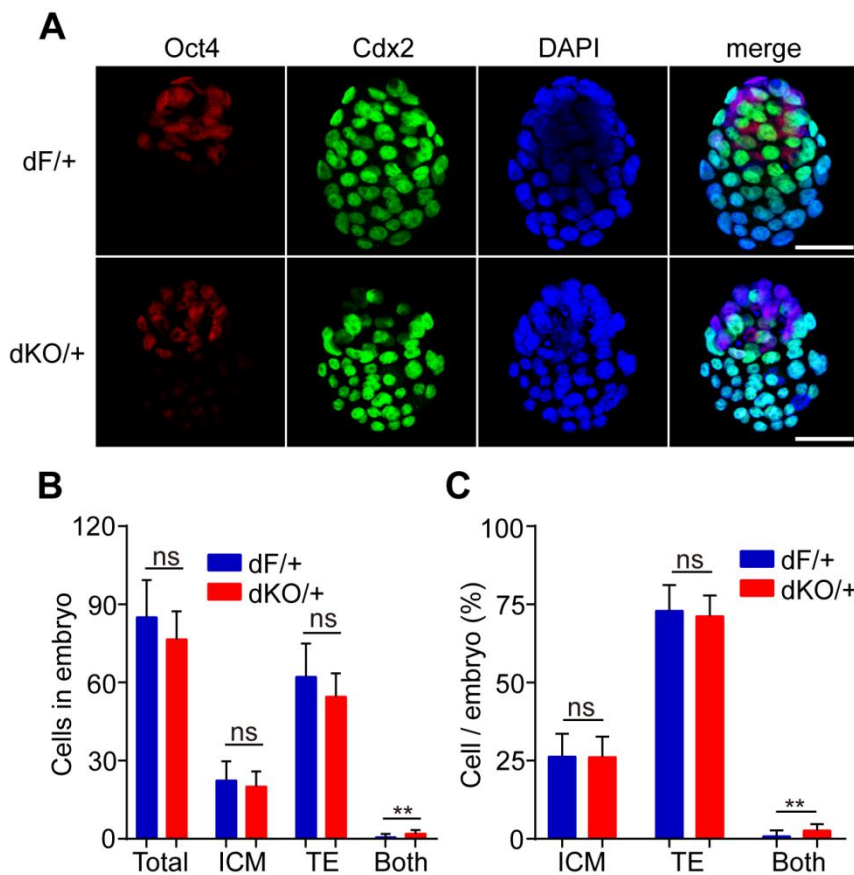

**Fig. S5. The normal differentiation of trophoblast (TE) and the inner cell mass (ICM) in dKO/+ embryos at E3.75.** (A) Representative images of Oct4 and Cdx2 immunostaining in embryos at E3.75. Inner cell mass (ICM) were stained with Oct4 (red) and trophoblast (TE) cells were stained with Cdx2 (green). Number of total embryos: dF/+, n=13; dKO/+, n=11. Scale bars, 50  $\mu$ m. (B) The number of different cell parts in embryos at E3.75. Results are presented as mean  $\pm$  SD. Statistical comparisons of values were made using Mann Whitney test (Total and Both) or unpaired *t* test (ICM and TE). ns, not significant; \*\**P* < 0.01. (C) The proportion of different cell parts at E3.75. Both: mix-expression of Oct4 and Cdx2. Results are presented as mean  $\pm$  SD. Statistical comparisons of values were made using Mann Whitney test (Both) or unpaired *t* test (ICM and TE). ns, not significant; \*\**P* < 0.01.



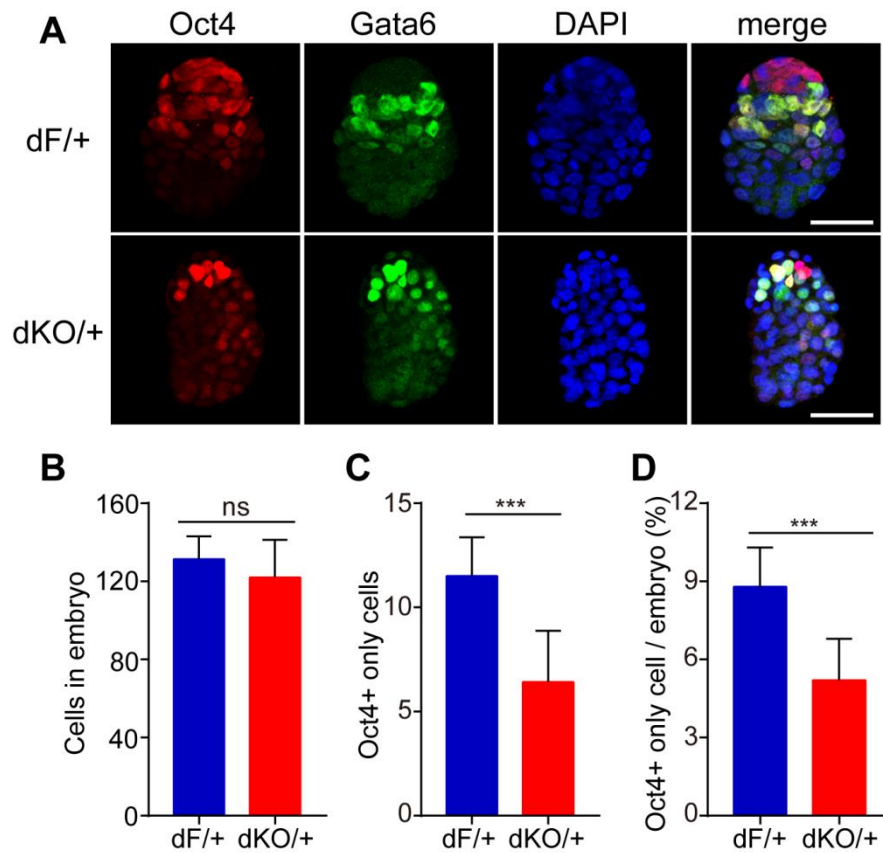

**Fig. S6. Oct4<sup>+</sup> only cells were decreased at E4.5.** (A) Representative images of Oct4 and Gata6 in embryos at E4.5. ICM cells were labeled by Oct4 (red) and PrE cells were marked by Gata6 (green). Number of total embryos: dF/+, n=6; dKO/+, n=19. Scale bars, 50  $\mu$ m. (B) The average number of total cells in embryos. Results are presented as mean  $\pm$  SD. Mann Whitney test: ns, not significant. (C) Decreased Oct4<sup>+</sup> only cells in dKO/+ embryos. Results are presented as mean  $\pm$  SD. Mann Whitney test: \*\*\* $P$  < 0.001. (D) Ratio of EPI cells classified by Oct4<sup>+</sup> only cells. Results are presented as mean  $\pm$  SD. Mann Whitney test: \*\*\* $P$  < 0.001.

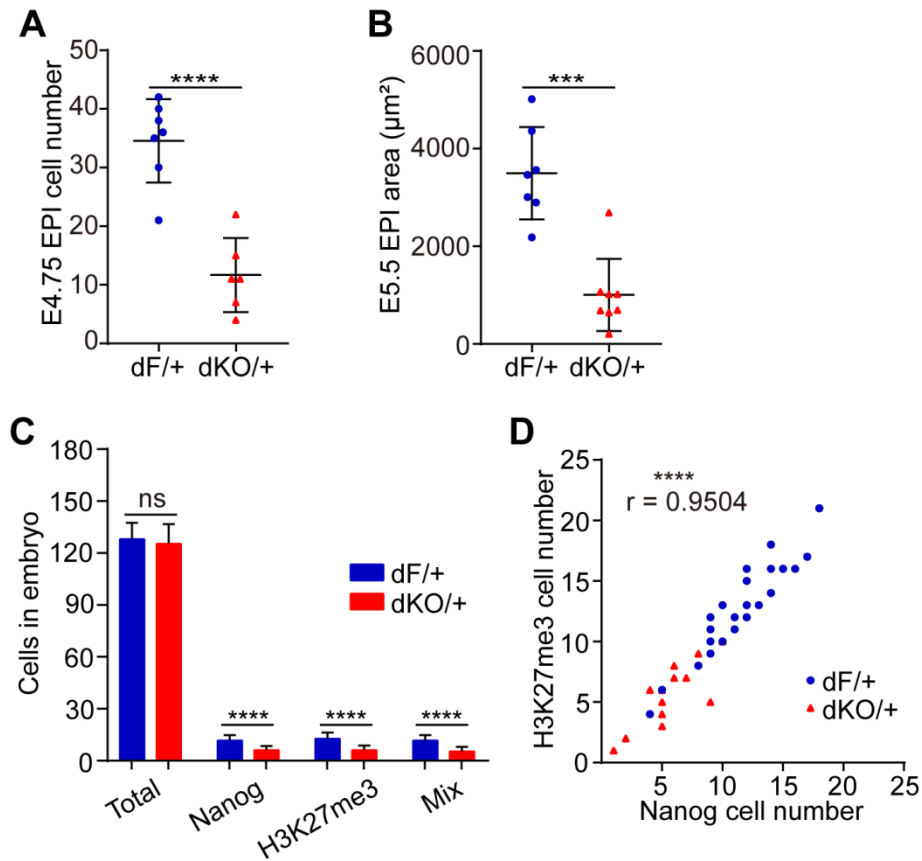

**Fig. S7. Decreased EPI cells from E4.5 to E5.5. (A)** EPI cell number at E4.75. Number of total embryos: dF/+, n=7; dKO/+, n=6. Results are presented as mean  $\pm$  SD. Unpaired *t* test: \*\*\*\**P* < 0.0001. **(B)** EPI area at E5.5. Results are presented as mean  $\pm$  SD. Mann Whitney test: \*\*\**P* < 0.001. **(C)** Decreased Nanog and H3K27me3 cells in dKO/+ embryos. Mix: cells showed both Nanog and H3K27me3 staining. Results are presented as mean  $\pm$  SD. Unpaired *t* test: ns, not significant; \*\*\*\**P* < 0.0001. **(D)** Correlation analysis of Nanog and H3K27me3 cell numbers. Number of total embryos: dF/+, n=31; dKO/+, n=17. The cell numbers is highly correlated; Pearson *r* = 0.9504. \*\*\*\**P* < 0.0001.



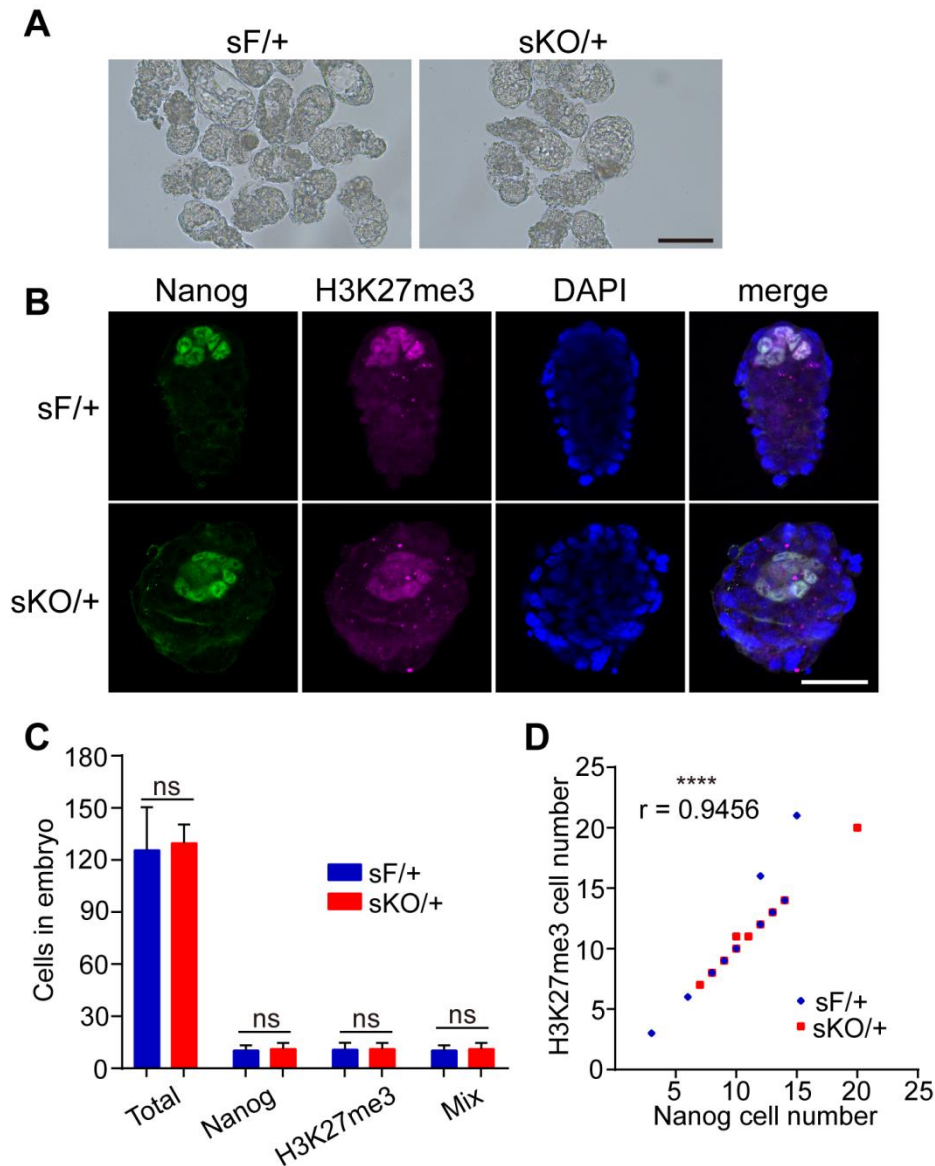

**Fig. S8. Normal epiblast cells in sKO/+ Embryos at E4.5.** (A) Representative images of flushed embryos at E4.5. Scale bars, 100  $\mu$ m. (B) Representative images of late blastocysts immunostained with Nanog and H3K27me3. Number of total embryos: sF/+, n=31; sKO/+, n=35. Scale bars, 50  $\mu$ m. (C) Quantitative analysis of Nanog and H3K27me3 cells. Mix: cells showed both Nanog and H3K27me3 staining. Results are presented as mean  $\pm$  SD. Mann Whitney test: ns, not significant. (D) Correlation analysis of Nanog and H3K27me3 cell numbers. Number of total embryos: sF/+, n=31; sKO/+, n=35. The cell numbers is highly correlated; Pearson  $r = 0.9456$ . \*\*\*\* $P < 0.0001$ .

**Table S1. Embryo transfer**

| Group | No. of recipients | No. of blastocysts transferred | Pups per litter | Term pups (%)   |
|-------|-------------------|--------------------------------|-----------------|-----------------|
| dF/+  | 13                | 170                            | 6.31 ± 2.32     | 82 (48.24%)     |
| dKO/+ | 9                 | 111                            | 2.22 ± 1.86***  | 20 (18.02%****) |

Pups per recipient are recorded as mean ± SD. Statistical comparisons were made using Mann Whitney test, \*\*\* $P < 0.001$ . Comparisons between dF/+ and dKO/+ about Pups (%) were by  $\chi^2$  test, \*\*\*\* $P < 0.0001$ .

**Table S2. Primers**

| Gene                                 | Sequence (5' to 3')      | Reference |
|--------------------------------------|--------------------------|-----------|
| Primers for genotype                 |                          |           |
| <i>Ezh2</i> -F                       | GCTAGAAGCATTCCCCACAC     |           |
| <i>Ezh2</i> -R                       | CTGGCTCTGTGGAACCAAAC     |           |
| <i>Ezh2</i> -R (within <i>lacZ</i> ) | ATGGGCCTCATAGTGACAGG     |           |
| <i>Ezh1</i> -F                       | GATGCCCTCAACCAGTACTC     |           |
| <i>Ezh1</i> -R                       | TTTATATCACGCACCCACAC     |           |
| <i>Ezh1</i> -R (within <i>lacZ</i> ) | TAAAGCGAGTGGCAACATGG     |           |
| <i>Gdf9</i> -Cre-F                   | TCTGATGAAGTCAGGAAGAACC   |           |
| <i>Gdf9</i> -Cre-R                   | GAGATGTCCTTCACTCTGATTC   |           |
| Internal control-F                   | CAAATGTTGCTTGTCTGGTG     |           |
| Internal control-R                   | GTCAGTCGAGTGCACAGTTT     |           |
| Primers for real-time PCR            |                          |           |
| <i>Ezh2</i> -F                       | TGACCCTGACCTCTGTCTCACG   |           |
| <i>Ezh2</i> -R                       | TCAGACGGTGCCAGCAGTAAGT   |           |
| <i>Ezh1</i> -F                       | AGCGATGCTGTGTTTCTGGA     |           |
| <i>Ezh1</i> -R                       | GGCGCTTCCGTTTCTTGTT      |           |
| <i>Eed</i> -F                        | ATGCCATTGTATGCTGGAAACC   |           |
| <i>Eed</i> -R                        | CACTGGCTGTAATCAAATCGCC   |           |
| <i>Suz12</i> -F                      | TCTCATCGAAATTCCAGAACAAGC |           |
| <i>Suz12</i> -R                      | CAAGCTATGAGATTCTTGCTCTCC |           |
| $\beta$ -actin-F                     | GTGACGAGGCCCAAGCAAGAG    | (1)       |
| $\beta$ -actin-R                     | CGTACATGGCTGGGGTGTTGAAGG |           |

**Table S3. Antibodies**

| Antibody                                     | Source              | Concentration            |
|----------------------------------------------|---------------------|--------------------------|
| Rabbit polyclonal Anti-Ezh2                  | Abcam, ab186006     | WB: 1:500                |
| Mouse monoclonal Anti-beta tubulin           | Proteintech, 66240  | WB: 1:2000               |
| Rabbit monoclonal Anti-H3K27me3              | CST, 9733           | IHC: 1:2500<br>IF: 1:400 |
| Rabbit monoclonal Anti-Vcam1                 | Abcam, ab134047     | IHC: 1:1000              |
| Rabbit polyclonal Anti-integrin alpha 4      | Santa Cruz, sc14008 | IHC: 1:1000              |
| Rabbit monoclonal Anti-H3K27me2              | CST, 9728           | IF: 1:400                |
| Rabbit monoclonal Anti-Oct4                  | Abcam, ab200834     | IF: 1:200                |
| Mouse monoclonal Anti-Cdx2                   | Biogenex, CDX-88    | IF: 1:200                |
| Rabbit polyclonal Anti-Nanog                 | Abcam, ab80892      | IF: 1:200                |
| Goat polyclonal Anti-Gata6                   | R&D systems, AF1700 | IF: 1:200                |
| Alexa Fluor 594 Goat Anti-Rabbit IgG         | ZSBIO, ZF-0516      | IF: 1:200                |
| Alexa Fluor 488 Goat Anti-Mouse IgG          | ZSBIO, ZF-0516      | IF: 1:200                |
| Alexa Fluor 568 Donkey Anti-Rabbit IgG (H+L) | Abcam, ab175693     | IF: 1:500                |
| Alexa Fluor 594 Donkey Anti-Rabbit IgG (H+L) | YEASEN, 34212ES60   | IF: 1:200                |
| Alexa Fluor 488 Donkey Anti-Goat IgG (H+L)   | YEASEN, 34306ES60   | IF: 1:200                |
| Alexa Fluor 647 Donkey Anti-Mouse IgG (H+L)  | YEASEN, 34113ES60   | IF: 1:200                |

**Table S4. Putative H3K27me3-dependent imprinted genes**

[Click here to download Table S4](#)

## Reference

1. Ciccone DN, Su H, Hevi S, Gay F, Lei H, Bajko J, et al. KDM1B is a histone H3K4 demethylase required to establish maternal genomic imprints. *Nature*. 2009;461(7262):415-8.
